# Supplementary material for: FOCA: a new quality-controlled database of floods and catchment descriptors in Italy
Source: Copernicus journal article supplement (doi:10.5194/essd-2023-233), 2023-08-31
Supplement: Supplementary file [file essd-2023-233-AC1-supplement.pdf]

Dear Editor,

I have reviewed the aforementioned work. My conclusions and comments are as follows:

1. Scope

The article is within the scope of ESSD.

2. Summary

In their paper, the authors describe the FOCA data set for Italy, the first nationwide data set of extreme values at 631 river gauges (annual maximum peak discharge and average daily annual maximum discharge) plus attributes of the related basins related to geomorphology, climatology, extreme rainfall, land cover and soil properties. In the introduction, the authors describe the importance of large-scale, long-term, multi-criteria hydrological data sets and give an overview on recent activities on global, European, and Italian scale. In the same and the following section, the authors explain how the here-introduced data set builds on previous work of (parts of) the authors, and how it goes beyond them, which is mainly in terms of adding to the existing hydrological data climatological, geomorphological, soil and land use attributes. In the following sections, the authors describe in detail the new data set, and how the data were derived and quality-checked, structured by i) geomorphological attributes (section 3), and ii) soil, vegetation, climate, and hydrological data (section 4). In the final section 5, the authors summarize the rationale for compiling the data set, point out how the data set moves beyond previously existing ones, and point to some specialties of the data set.

3. Evaluation

The paper provides a well-structured, self-contained description of the FOCA data set. The authors both show how the data set builds on existing data sets and also how it goes beyond them. Overall, the data set provides real value to the community and the paper deserves publication. The data sources, rationale for data selection, data checks and transformations are clearly described and valid.

*R: We thank the reviewer for having appreciated our work.*

A few technical details that require some more attention:

Data set range

I think the wide range of catchment sizes and elevation zones covered by FOCA is a valuable and relevant feature, but it is mentioned explicitly only in the conclusion. I recommend mentioning this already in the abstract.

*R: In the revised version of the manuscript we added this detail in the abstract.*

Catchments near the sea shore Fig. 2 (and others) reveal that no catchments with gauges close to the sea shore are included in the data set (grey "rim" along the coast). Why is this so, and does this provide a bias to the data set? Please add an explanation to the text at the appropriate place.

*R: The reviewer is right: the absence of basins near the coastline is unfortunate and could introduce a bias. However, there is a reason behind this lack, that is systematic in Italy: most of the gauging stations were installed in support to possible hydropower or agricultural or drinking uses of water. The 631 chosen catchments are those for which peak or daily discharges are available, and therefore all included in the "Catalogo delle Piene dei Corsi d'acqua Italiani". But also other catchments, where no flood peaks were available, were positioned relatively far from the coast. We hope that the regional hydrological agencies in charge of the monitoring networks will install hydrometers closer to the coast to be able to further extend the range of basins covered by our dataset in the near future. Some details on this feature are now included in rows 232-236.*

## Uncertainty estimates

For many applications of the FOCA data set, it will be important to have an (at least rough) estimate of the data uncertainty. For most of the data, the authors provide a clear account of data quality checks, but uncertainty estimates are lacking. This will be especially important for the data derived from observed time series (discharge, precipitation, air temperature), as here related uncertainties are highest. E.g. for the extreme rainfall data, parts of the reporting on uncertainty can be based on the variance of the variogram used for spatial interpolation (lines 362 pp), or for discharge data uncertainty of the water level recordings plus the uncertainty of the rating curve can be used.

*R: The topic is interesting and assumes different characters if referred to local measurements, such as discharges in river sections, or to areal-averaged values.*

*Starting from local measurements, peak and daily discharges included in the dataset are taken from the official Yearbooks published by the national or regional hydrological agencies. Before publication, these data were validated through application of the corresponding rating curves for every year of measurement. It is not possible to rate the uncertainty of the level-to-discharge conversion without entering very specific technical issues that can be dealt with only in a strict cooperation with the technicians who validated every peak discharge value. This should be done for every single measurement section, as no information about the uncertainty was provided together with the data that we used. This explains why general conclusions cannot be drawn about uncertainty of observed discharge values.*

*We did not include this piece of information in our paper, similarly to what was found in other similar papers related to national datasets. As a matter of fact, information on data uncertainty in the data is, in many cases, very difficult to find.*

*However, we take advantage of this question to better describe the quality of the data used, as specified in the following.*

*Information about monthly rainfall depths, monthly mean temperatures, mean annual precipitation and mean annual temperatures were obtained from a gridded dataset named BIGBANG4.0, produced by the official national reference center of all the regional monitoring agencies in Italy, i.e. the I.S.P.R.A. Institute. The reference network for the BIGBANG4.0 dataset has evolved over time. For mean monthly and annual rainfall depths we were able to find some information on the network density (Figure 6.22 of [https://groupware.sinanet.isprambiente.it/bigbang-data/library/bigbang\\_60/rapporto\\_ispra\\_339-21\\_bigbang\\_hd/download/en/1/RAPPORTO\\_ISPRA\\_339-21\\_BIGBANG\\_HD.pdf?action=view](https://groupware.sinanet.isprambiente.it/bigbang-data/library/bigbang_60/rapporto_ispra_339-21_bigbang_hd/download/en/1/RAPPORTO_ISPRA_339-21_BIGBANG_HD.pdf?action=view)). One could notice that the station density is not uniform all over Italy. This means that we can expect local variation in the overall accuracy, with inverse proportion to station density. The interpolation method used was a modified version of the natural neighbours methodology.*

*The dataset of rainfall extremes is characterized by a similar but more uniform data density, especially in some part of North of Italy, as visible in Figure 2 of <https://doi.org/10.1080/19475705.2023.2205000>. The interpolation method used was an ordinary kriging, as specified in the paper.*

Line 433: Figure 4 → Figure 10.

*R: We thank the reviewer for having highlighted this error. In the revised version of the manuscript we corrected it.*

Line 460: Took → take

*R: Corrected in the revised version.*

Data set on Zenodo I checked the FOCA dataset as published on <https://doi.org/10.5281/zenodo.8060737>. It contains all the data discussed in the article, the files structure and the formatting of the data is reasonable, understandable and serves the purpose. The file "FOCA\_Supporting\_Information.pdf" provides a short and concise overview on the data, with one exception: The row raster maps (section 1.5 in the .pdf) just lists the raster maps, but does not provide an explanation of the maps. Please add.

*R: We thank the reviewer for having highlighted this point. We uploaded a revised version of the "FOCA\_Supporting\_Information.pdf" file with more information on the contents of the raster files.*

Overall, I think the manuscript is worthy of publication after the above-mentioned minor revisions have been done.

Yours sincerely,

Uwe Ehret
